# Supplementary material
Source: PubMed Central journal article supplement (PMC1914126)
Supplement: plntphys_pp.107.096115_1.pdf [file plntphys_pp.107.096115_1.pdf]

## Detailed materials and methods

**Plasmid constructs.** The *ORCA3* promoter (accession number AJ251250) was isolated by inverse PCR with primers OR5 (5'-AGATCTCATATGTCCGAAGAACTATTTCCGTCTCAG-3') and OR8 (5'-GATGAATAGAGTGAGGAGTGG-3') on EcoRI-digested and re-ligated genomic DNA. The *ORCA3* promoter fragment generated on genomic DNA by PCR was cloned into pGEM-T Easy (Promega) such that the OR8 sequence flanked the SP6 side of the polylinker. An EcoRI fragment containing the *ORCA3* promoter from positions -826 to -53 relative to the ATG codon (AJ251250) was transferred to GusXX (Pasquali et al., 1994) to generate the plasmid  $\Delta 826$ GusXX. *ORCA3* 5' promoter deletion fragments  $\Delta 606$ ,  $\Delta 190$  and,  $\Delta 88$  were generated by PCR on plasmid  $\Delta 826$ GusXX using primers  $\Delta 606$  (5'-CGTCTAGAAAATACACTATCTAAACAT-3'),  $\Delta 190$ F (5'-AACTGCAGTAATTGCACCTCCCAAGCGC-3') and  $\Delta 88$  (5'-AACTGCAGCTTAGTATATAAATTCCACTC-3'), respectively, combined with the GUS3 primer (5'-CTGAATGCCACAGGCCGTCGAG-3'). The PCR fragments were cut with XbaI/EcoRI, PstI/EcoRI and PstI/EcoRI, respectively, and cloned into GusXX. *ORCA3* 5' promoter deletion fragments  $\Delta 354$ ,  $\Delta 264$  and  $\Delta 121$  were isolated by digestion of the  $\Delta 826$  *ORCA3* promoter with DraI/EcoRI, SnaBI/EcoRI and SspI/EcoRI, respectively, and the appropriate fragments were cloned into GusXX digested with SmaI/EcoRI. *ORCA3* internal promoter deletion  $264\Delta 1$  was generated by PCR with primers  $\Delta 190$ R (5'-GAAGATCTGTACGTTTACACAGAATTAA-3') and T3 on plasmid  $\Delta 264$ -

GusXX. The PCR product was cut with BglII/BamHI/SacI, and a 75 bp BamHI/BglII fragment was cloned into  $\Delta 121$ GusXX digested with BamHI. To generate 264 $\Delta 2$ , a 145 bp BamHI/SspI fragment was cloned into  $\Delta 88$ GusXX digested with BamHI/SmaI. To generate 264 $\Delta 3$ , a PCR product produced with primers  $\Delta 190$ F and GUS3 on  $\Delta 826$ GusXX was cut with Avall, filled in with the Klenow fragment of DNA polymerase I and cut with EcoRI. The resulting 125 bp fragment was cloned into GusXX digested with EcoRI/SmaI generating  $\Delta 162$ GusXX. Fragment A was excised with BamHI/BglII from pIC19H-A (see below) and cloned into  $\Delta 162$ GusXX, resulting in 264 $\Delta 3$ GusXX. To construct 264 $\Delta 4$ , a 230 bp fragment obtained by cutting  $\Delta 264$ GusXX with SacI/EcoRI was cut with Avall, filled in with the Klenow fragment of DNA polymerase I and cut with BamHI. The resulting 110 bp fragment was cloned into pIC-19H (Marsh et al., 1984) digested with BamHI/EcoRV. A BamHI/BglII fragment excised from this plasmid was cloned into  $\Delta 121$ GusXX cut with BamHI, resulting in 264 $\Delta 4$ GusXX. A 6Tcyt fragment was isolated from 6TcytGusSH-47 (Menke et al., 1999) with BamHI/PstI and cloned into  $\Delta 88$ GusXX to generate the control construct 6Tcyt- $\Delta 88$ GusXX. ORCA3 promoter fragment A was generated by PCR with primers  $\Delta 190$ R and T3 on plasmid  $\Delta 264$ GusXX. The PCR fragment was cut with BglII/BamHI/SacI, and a 75 bp BamHI/BglII fragment was cloned in pIC-19R digested with BamHI/BglII. To generate fragment B, a BamHI/SalI fragment was isolated from  $\Delta 190$ GusXX, cut with SspI, and the 85 bp BamHI/SspI fragment was cloned into pIC-19H digested with BamHI/EcoRV. To generate fragments C and D, SspI/DdeI and Avall/DdeI fragments, respectively, were isolated from

$\Delta$ 190GusXX, filled in with the Klenow fragment of DNA polymerase I and cloned into pIC-20H digested with EcoRV/SmaI such that the DdeI half-sites flanked the SmaI half-site. Fragments were tetramerized according to Ouwkerk and Memelink (1997) using the enzyme combination BamHI/BglII. Tetramers 4A and 4B were cloned as BamHI/XhoI fragments into GusSH-47 (Pasquali et al., 1994) digested with BamHI/SalI. Tetramers 4C, 4D and its mutant derivatives were cloned into GusSH-47 as SacI/BamHI fragments. *ORCA3* promoter-*GUS* fusions were transferred from the GusXX plasmid to the binary vector pMOG22 $\lambda$ CAT (Menke et al., 1999) as XbaI/XhoI fragments, whereas the tetramer-*GUS* fusions and 6Tcyt- $\Delta$ 88Gus were transferred with SacI/HindIII. For the AT-hook overexpression constructs, the inserts of clones 2D38M, 2D7 and 2D173 were excised with BamHI/BglII, BamHI/XbaI or EcoRI/XbaI and cloned in expression vector pRT101 (Töpfer et al., 1987) digested with BamHI, BamHI/XbaI or EcoRI/XbaI.

**Cell transformation.** *C. roseus* cell line BIX was transformed using *Agrobacterium tumefaciens* strain LBA4404 containing the ternary plasmid pBBR1MCS-5 carrying the constitutive *VirGN54D* mutant gene and *ORCA3* promoter derivatives in pMOG22 $\lambda$ CAT as described (van der Fits et al., 2000). Cell suspension cultures were grown as described (Menke et al., 1999)

**RNA extraction and Northern blot analysis.** RNA extraction and Northern blot analysis were performed as described before (Menke et al., 1999). Northern blots

were probed using  $^{32}\text{P}$ -labeled DNA probes corresponding to the full-length *ORCA3*, *GUS* and *CAT* coding regions or the complete *AT-hook* and *Rps9* (encoding ribosomal protein S9) inserts.

**Yeast one-hybrid screening** A monomer and a dimer of the D fragment and a tetramer of the C fragment were cloned as BamHI/BglII fragments from pIC-20H into the BamHI site of pHIS3NX (Meijer et al., 1998). Gene fusions of 1D-, 2D- and 4C-*HIS3* were transferred as NotI/XbaI fragments to pINT1 (Meijer et al., 1998). The resulting plasmids were digested with NcoI/SacI and introduced into yeast strain Y187 (Harper et al., 1993). Recombinants were selected on YPD medium containing 200  $\mu\text{g/ml}$  G418, and the occurrence of double cross-over integration events between the pINT1 derivative and the chromosomal *PDC6* locus was verified via Southern blot analysis. To construct the library from MeJA-treated cells, cDNA was synthesized with a Stratagene HybriZAP-2.1 XR kit on poly(A) RNA prepared from 2 different total RNA samples, mixed in a 1:1 ratio, isolated from cultures of cell suspension line MP183L that were treated with 50  $\mu\text{M}$  MeJA for 0.5 and 2 h, respectively. The amplified lambda HybriZAP-2.1 library, consisting of  $4 \times 10^6$  independent primary transformants, was converted to a pAD-GAL4-2.1 plasmid library according to the manufacturer's instructions.

### **Electrophoretic Mobility Shift Assays**

The inserts from pAD2D81, pAD2D206, pAD2D21, pAD2D328, pAD2D1 and pAD2D7 were isolated with BamHI/XhoI, and cloned in pGEX-KG (Guan and

Dixon, 1991). The insert from pAD2D449 was isolated with EcoRI/XhoI, and cloned in pGEX-4T1 (GE Healthcare). The insert from pAD2D173 was amplified by PCR with the primers AD173ATG (5'-GGAATTCAAAATGGATCATTCACTACCACCTC-3') and 3AD2, digested with EcoRI/XhoI, and cloned in pGEX-4T1. The inserts of clones pACT-4C19, 4C32, 4C49 and 4C87 were cloned in pGEX-KG with SmaI/XhoI, EcoRI/HindIII, SmaI/XhoI and EcoRI/XhoI, respectively. Expression plasmids were introduced in *E. coli* strain BL21 (DE3) pLysS or its derivative RosettaGami B. D wild-type and mutant fragments were isolated from pIC-20H with XbaI/XhoI and labeled by filling in the overhangs with the Klenow fragment of DNA polymerase I and  $\alpha$ -<sup>32</sup>P-dCTP. EMSAs were performed as previously described (Menke et al., 1999).

## References

- Guan, K. L. & Dixon, J. E. (1991) *Anal. Biochem.* **192**, 262-267.
- Harper, J. W., Adami, G. R., Wei, N., Keyomarsi, K. & Elledge, S. J. (1993) *Cell* **75**, 805-816.
- Marsh, J.C., Erfle, M. & Wykes, E.J. (1984) *Gene* **32**, 481-485.
- Meijer, A. H., Ouwerkerk, P. B. F. & Hoge, J. H. C. (1998) *Yeast* **14**, 1407-1416.
- Menke, F. L. H., Champion, A., Kijne, J. W. & Memelink, J. (1999) *EMBO J.* **18**, 4455-4463.
- Ouwerkerk, P. B. F. & Memelink, J. (1997) *Trends Genet.* **13**, 207.
- Pasquali, G., Ouwerkerk, P. B. F. & Memelink, J. (1994) *Gene* **149**, 373-374.
- Töpfer, R., Matzeit, V., Gronenborn, B., Schell, J. & Steinbiss, H.-H. (1987) *Nucl. Acids Res.* **15**, 5890.
- van der Fits, L., Deakin, E. A., Hoge, J. H. C. & Memelink J. (2000) *Plant Mol. Biol.* **43**, 495-502.
